# Supplementary material for: NIR-emissive, singlet-oxygen-sensitizing gold tetra(thiocyano)corroles
Source: Royal Society of Chemistry journal article supplement (doi:10.1039/d2dt01959k), 2022-01-01
Supplement: d2dt01959k1.pdf [file d2dt01959k1.pdf]

## Electronic Supplementary Information (ESI†)

### **NIR-Emissive, Singlet-Oxygen–Sensitizing Gold Tetra(thiocyano)corroles**

Kasturi Sahu,<sup>a</sup> Sara Angeloni,<sup>b</sup> Jeanet Conradie,<sup>c,d</sup> Marco Villa,<sup>b</sup> Manisha Nayak,<sup>a</sup>  
Abhik Ghosh,<sup>\*,c</sup> Paola Ceroni,<sup>\*,b</sup> and Sanjib Kar<sup>\*,a</sup>

<sup>a</sup>*School of Chemical Sciences, National Institute of Science Education and Research (NISER), Bhubaneswar – 752050, India, and Homi Bhabha National Institute, Training School Complex, Anushakti Nagar, Mumbai, 400 094, India. E-mail: [sanjib@niser.ac.in](mailto:sanjib@niser.ac.in)*

<sup>b</sup>*Department of Chemistry "G. Ciamician," University of Bologna, via Selmi 2, 40126 Bologna, Italy. E-mail: [paola.ceroni@unibo.it](mailto:paola.ceroni@unibo.it)*

<sup>c</sup>*Department of Chemistry, UiT – The Arctic University of Norway, N-9037 Tromsø, Norway; Email: [abhik.ghosh@uit.no](mailto:abhik.ghosh@uit.no)*

<sup>d</sup>*Department of Chemistry, University of the Free State, P.O. Box 339, Bloemfontein 9300, Republic of South Africa.*

- Fig. S1** ORTEP diagram of **2**. Hydrogen atoms are omitted for clarity. Ellipsoids are drawn at 50% probability.
- Fig. S2** (a) Electronic absorption spectra of compounds **1** and **1a** ( $\beta$ -unsubstituted corrolato-Au(III) analogue of compound **1**), and (b) Electronic absorption spectra of compounds **2** and **2a** ( $\beta$ -unsubstituted corrolato-Au(III) analogue of compound **2**) in dichloromethane.
- Fig. S3** Excitation (dashed line) and absorption spectra (solid line) of compound **1** (a) and **2** (b) in toluene solution ( $\lambda_{em}=900$  nm).
- Fig. S4** Time-resolved PL decay of **2** (black line) and **1** (red line) recorded in deaerated toluene with  $\lambda_{exc} = 365$  nm.
- Fig. S5** FT-IR spectrum of **1** as a KBr pellet.
- Fig. S6** FT-IR spectrum of **2** as a KBr pellet.
- Fig. S7** ESI- MS spectrum of **1** in CH<sub>3</sub>CN shows the measured spectrum with an isotopic distribution pattern
- Fig. S8** ESI- MS spectrum of **2** in CH<sub>3</sub>CN shows the measured spectrum with an isotopic distribution pattern
- Fig. S9** <sup>1</sup>H NMR (400 MHz) spectrum of **1** in CDCl<sub>3</sub>.
- Fig. S10** <sup>1</sup>H NMR (400 MHz) spectrum of **2** in CDCl<sub>3</sub>.

### Optimized Cartesian coordinates (Å)

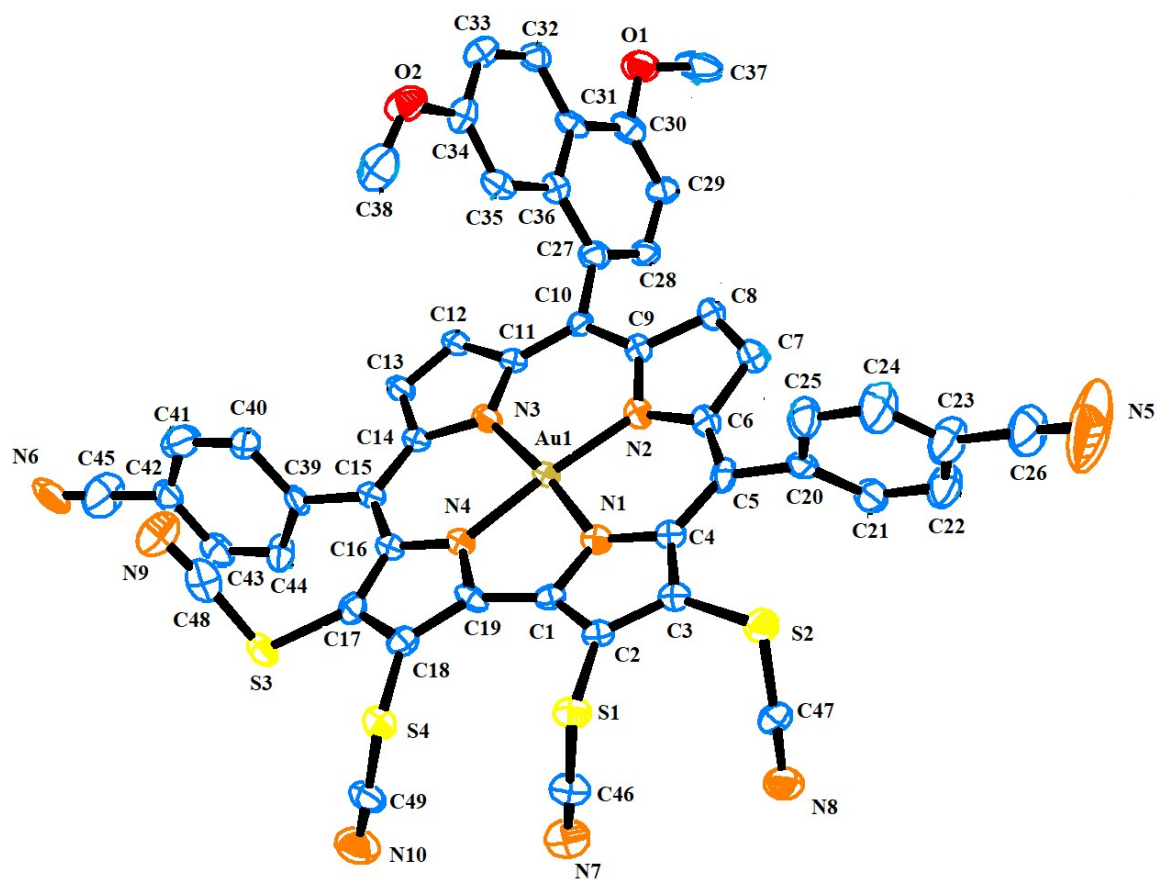

**Fig. S1** ORTEP diagram of **2**. Hydrogen atoms are omitted for clarity. Ellipsoids are drawn at 50% probability.

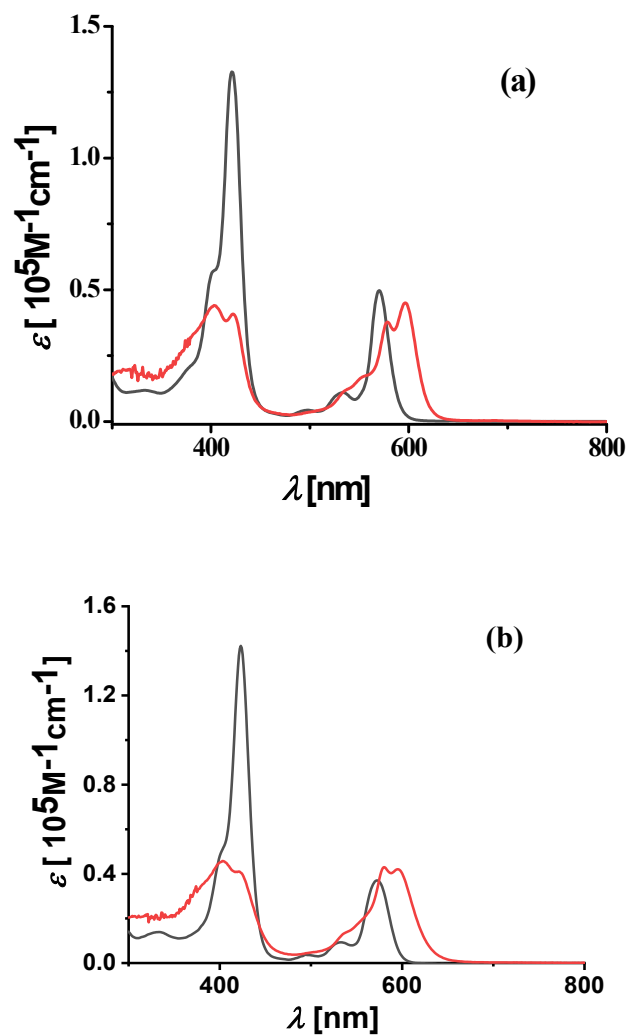

**Fig. S2** (a) Electronic absorption spectra of compounds **1** (red solid line) and **1a** (black solid line;  $\beta$ -unsubstituted corrolato-Au(III) analogue of compound **1**), and (b) Electronic absorption spectra of compounds **2** (red solid line) and **2a** (black solid line;  $\beta$ -unsubstituted corrolato-Au(III) analogue of compound **2**) in dichloromethane.

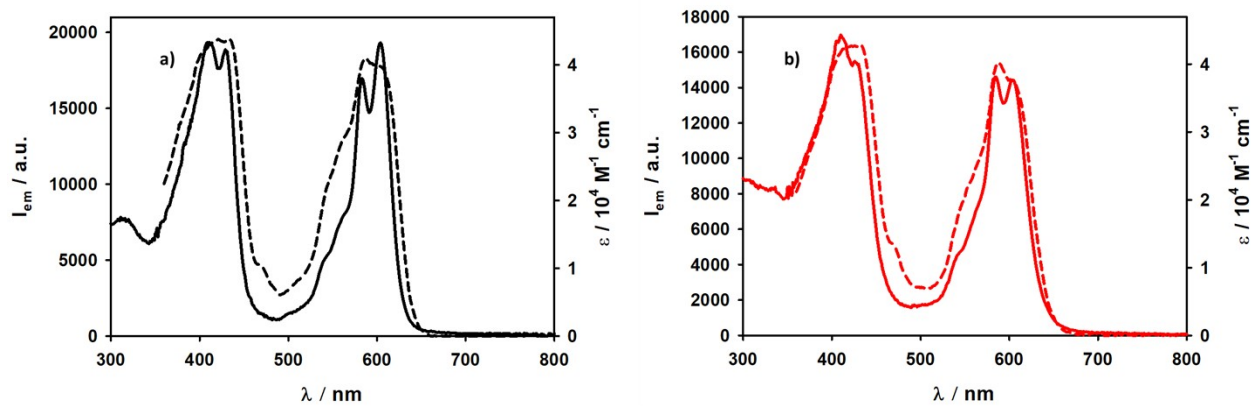

**Fig. S3** Excitation (dashed line) and absorption spectra (solid line) of compound **1** (a) and **2** (b) in deaerated toluene solution ( $\lambda_{em}=900 \text{ nm}$ ).

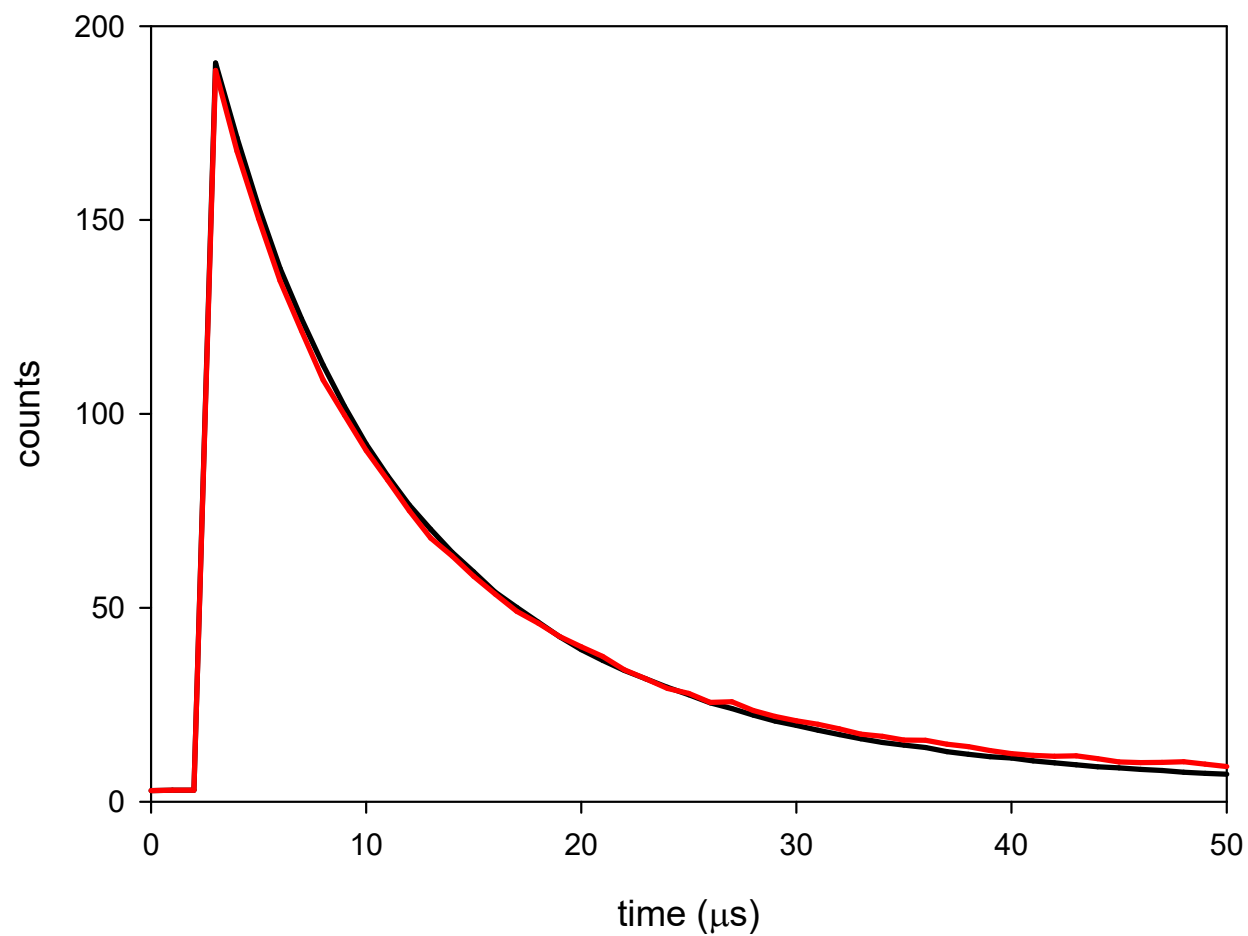

**Fig. S4** Time resolved PL decay of **2** (black line) and **1** (red line) recorded in deaerated toluene with  $\lambda_{\text{exc}} = 365$  nm.

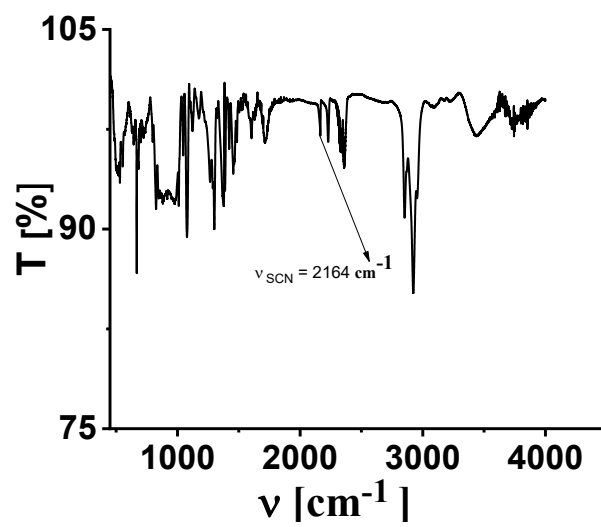

**Fig. S5** FT-IR spectrum of **1** as a KBr pellet.

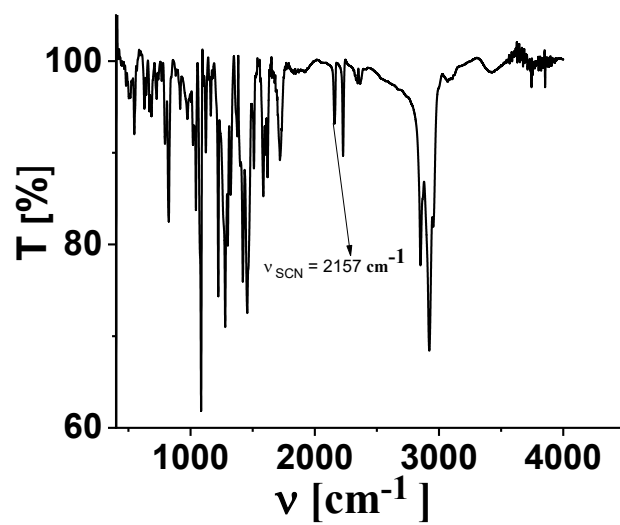

**Fig. S6** FT-IR spectrum of **2** as a KBr pellet.



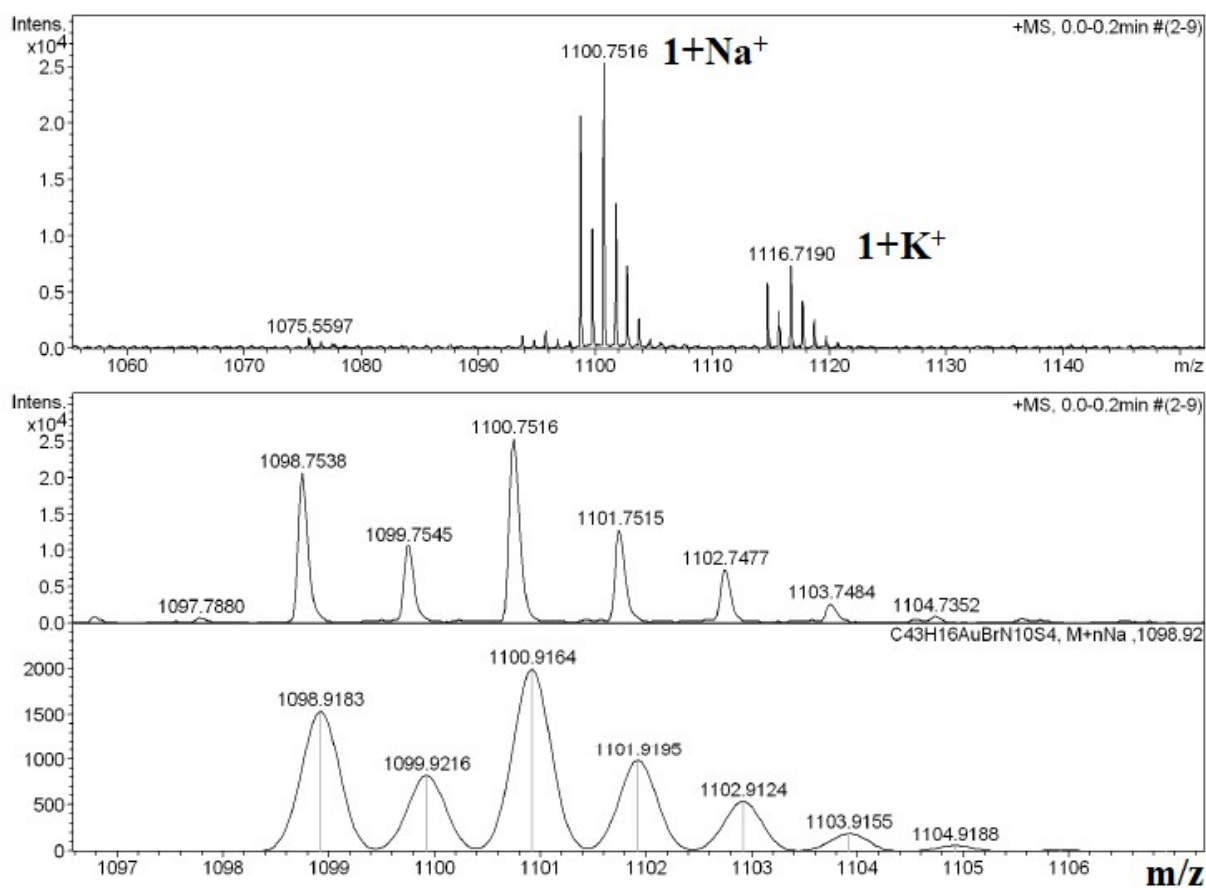

**Fig. S7** ESI- MS spectrum of **1** in  $CH_3CN$  shows the measured spectrum with isotopic distribution pattern

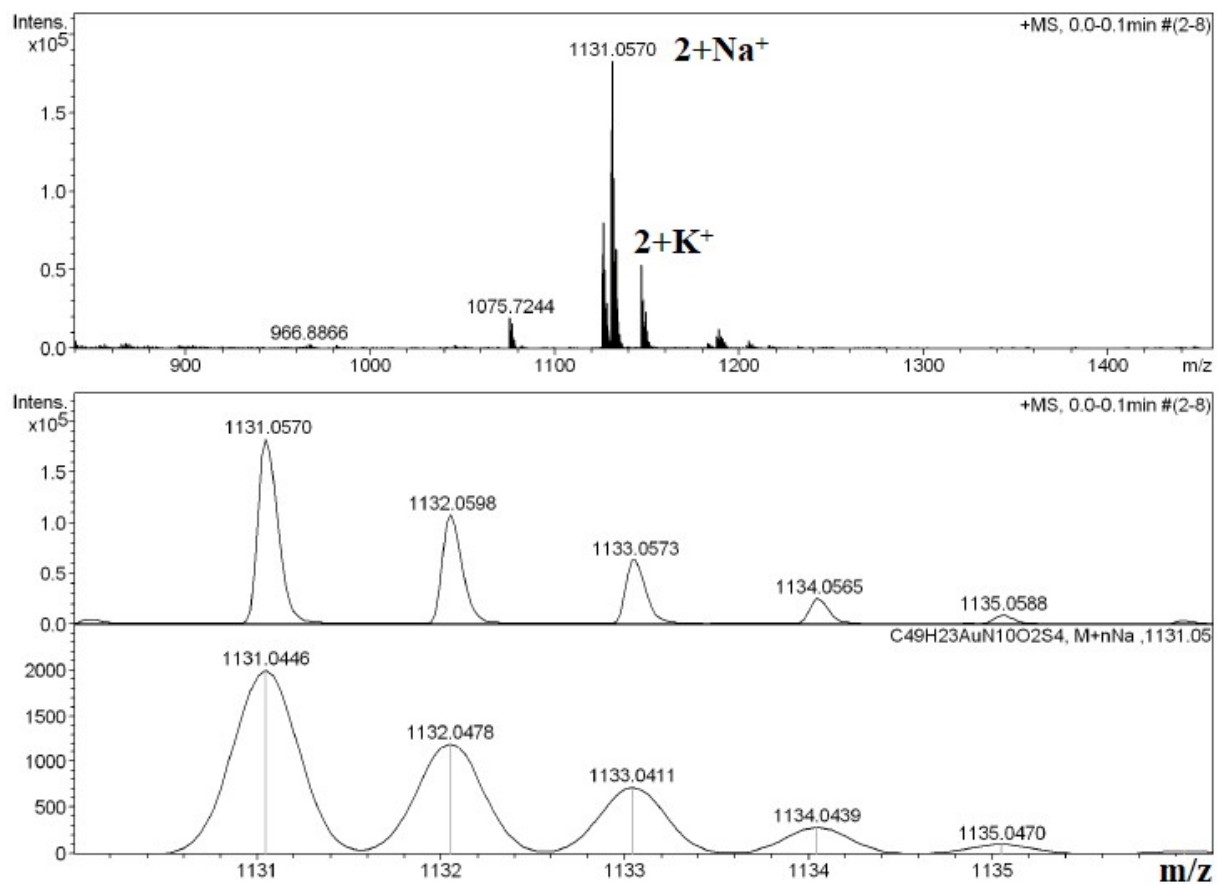

**Fig. S8** ESI- MS spectrum of **2** in  $CH_3CN$  shows the measured spectrum with isotopic distribution pattern

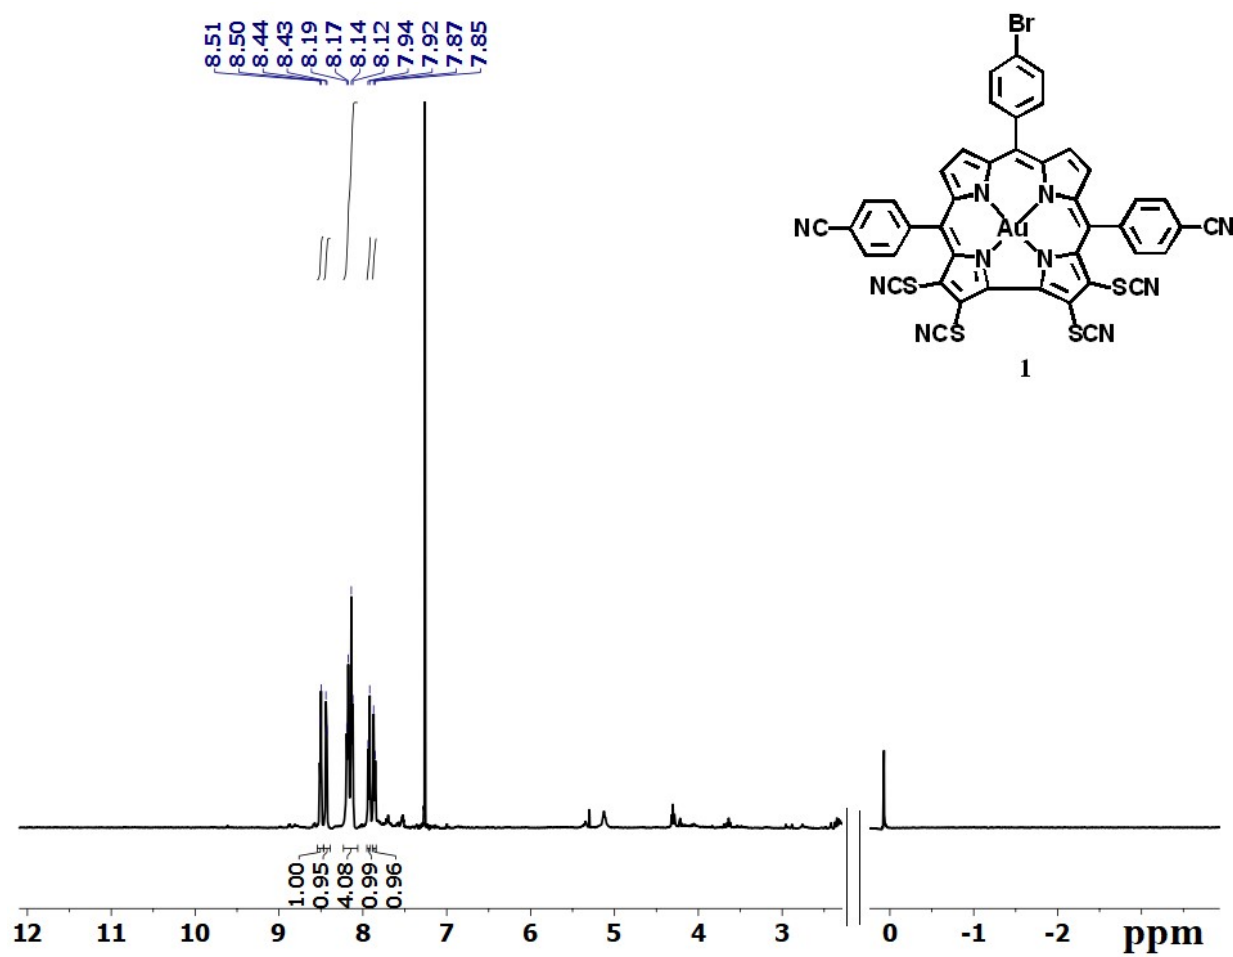

**Fig. S9**  $^1\text{H}$  NMR (400 MHz) spectrum of **1** in  $\text{CDCl}_3$ .

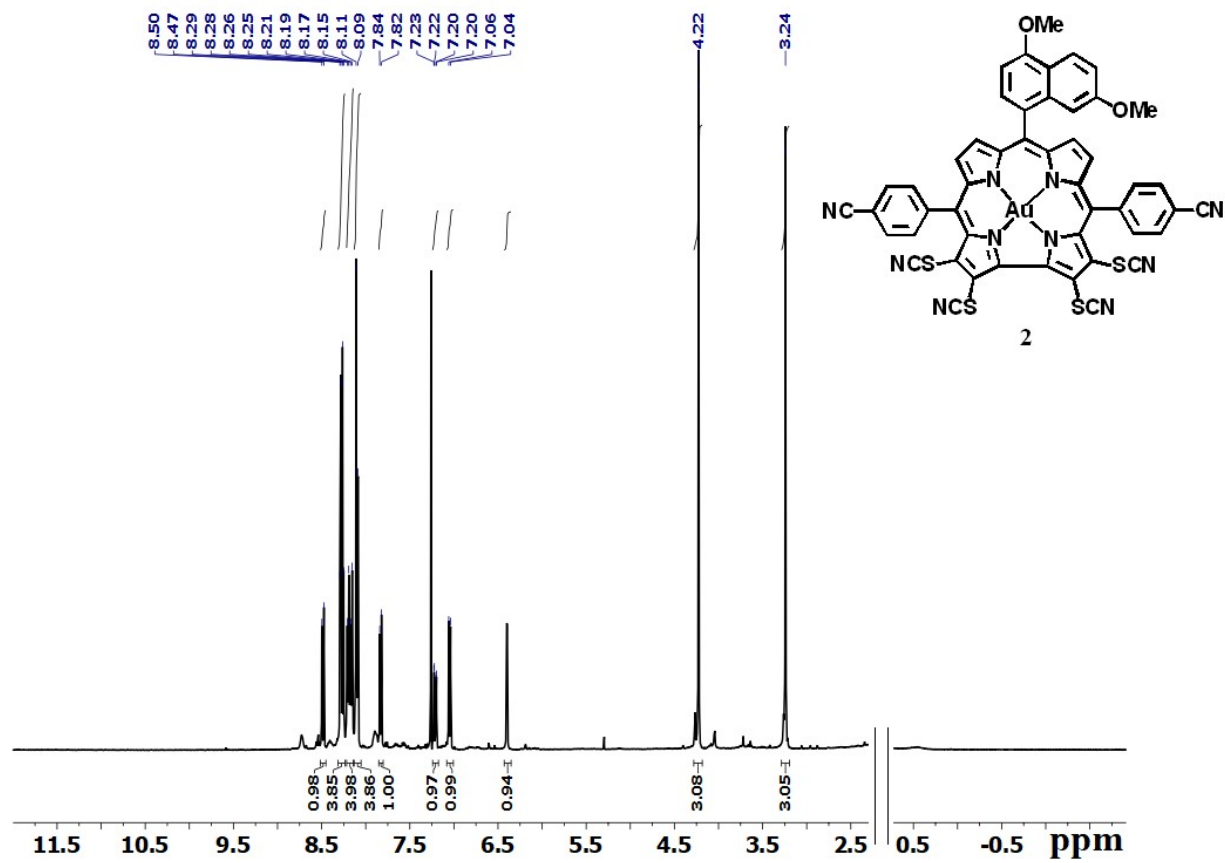

**Fig. S10**  $^1\text{H}$  NMR (400 MHz) spectrum of **2** in  $\text{CDCl}_3$ .

## Optimized Cartesian coordinates (Å)

All compounds were optimized the ZORA Hamiltonian, ZORA/TZ2P basis set, all electron, B3LYP\* functional and the Grimme's D3 dispersion correction in the gas phase.

### Table of Contents

|                                                                                     |    |
|-------------------------------------------------------------------------------------|----|
| <b>NIR-Emissive, Singlet-Oxygen–Sensitizing Gold Tetra(thiocyano)corroles</b> ..... | 12 |
| Table of Contents .....                                                             | 12 |
| 1. Au[TPC] neutral.....                                                             | 13 |
| 2. Au[TPC] anion.....                                                               | 14 |
| 3. Au[TPC] cation.....                                                              | 15 |
| 4. Au[TPC(SCN) <sub>4</sub> ] neutral.....                                          | 17 |
| 5. Au[TPC(SCN) <sub>4</sub> ] anion.....                                            | 19 |
| 6. Au[TPC(SCN) <sub>4</sub> ] cation .....                                          | 20 |

### 1. Au[TPC] neutral

|    |              |              |              |
|----|--------------|--------------|--------------|
| Au | 0.000000000  | 0.000000000  | 0.119826000  |
| N  | 1.387793000  | -0.430310000 | -1.207558000 |
| N  | -1.387793000 | 0.430310000  | -1.207558000 |
| N  | -1.183226000 | 0.419214000  | 1.610131000  |
| N  | 1.183226000  | -0.419214000 | 1.610131000  |
| C  | 2.652323000  | -0.898745000 | -0.886863000 |
| C  | 3.276527000  | -1.204661000 | -2.145453000 |
| C  | 2.399357000  | -0.914718000 | -3.153351000 |
| C  | 1.186841000  | -0.415274000 | -2.565452000 |
| C  | 0.000000000  | 0.000000000  | -3.209169000 |
| C  | -1.186841000 | 0.415274000  | -2.565452000 |
| C  | -2.399357000 | 0.914718000  | -3.153351000 |
| C  | -3.276527000 | 1.204661000  | -2.145453000 |
| C  | -2.652323000 | 0.898745000  | -0.886863000 |
| C  | -3.190925000 | 1.063587000  | 0.409652000  |
| C  | -2.482544000 | 0.823232000  | 1.613371000  |
| C  | -2.842876000 | 0.894181000  | 2.998862000  |
| C  | -1.740030000 | 0.533910000  | 3.760570000  |
| C  | -0.678175000 | 0.224102000  | 2.870466000  |
| C  | 0.678175000  | -0.224102000 | 2.870466000  |
| C  | 1.740030000  | -0.533910000 | 3.760570000  |
| C  | 2.842876000  | -0.894181000 | 2.998862000  |
| C  | 2.482544000  | -0.823232000 | 1.613371000  |
| C  | 3.190925000  | -1.063587000 | 0.409652000  |
| C  | 4.598582000  | -1.527350000 | 0.529434000  |
| C  | 4.899367000  | -2.722774000 | 1.190874000  |
| C  | 6.214463000  | -3.154043000 | 1.316415000  |
| C  | 7.253391000  | -2.396600000 | 0.785189000  |
| C  | 6.967545000  | -1.204283000 | 0.128136000  |
| C  | 5.652115000  | -0.773992000 | 0.001181000  |
| C  | 0.000000000  | 0.000000000  | -4.699407000 |
| C  | 0.858651000  | 0.840232000  | -5.414522000 |
| C  | 0.860069000  | 0.840027000  | -6.804448000 |
| C  | 0.000000000  | 0.000000000  | -7.504495000 |
| C  | -0.860069000 | -0.840027000 | -6.804448000 |
| C  | -0.858651000 | -0.840232000 | -5.414522000 |
| C  | -4.598582000 | 1.527350000  | 0.529434000  |
| C  | -5.652115000 | 0.773992000  | 0.001181000  |
| C  | -6.967545000 | 1.204283000  | 0.128136000  |
| C  | -7.253391000 | 2.396600000  | 0.785189000  |
| C  | -6.214463000 | 3.154043000  | 1.316415000  |
| C  | -4.899367000 | 2.722774000  | 1.190874000  |
| H  | 4.091511000  | -3.319901000 | 1.596698000  |
| H  | 6.427156000  | -4.087073000 | 1.825626000  |
| H  | 8.279131000  | -2.732561000 | 0.883869000  |

|   |              |              |              |
|---|--------------|--------------|--------------|
| H | 7.771106000  | -0.602892000 | -0.281419000 |
| H | 5.433443000  | 0.161828000  | -0.499448000 |
| H | -1.521819000 | -1.503405000 | -4.871555000 |
| H | 1.521819000  | 1.503405000  | -4.871555000 |
| H | 1.529558000  | 1.502344000  | -7.341104000 |
| H | 0.000000000  | 0.000000000  | -8.588292000 |
| H | -1.529558000 | -1.502344000 | -7.341104000 |
| H | -4.091511000 | 3.319901000  | 1.596698000  |
| H | -6.427156000 | 4.087073000  | 1.825626000  |
| H | -8.279131000 | 2.732561000  | 0.883869000  |
| H | -7.771106000 | 0.602892000  | -0.281419000 |
| H | -5.433443000 | -0.161828000 | -0.499448000 |
| H | -4.269021000 | 1.611509000  | -2.252301000 |
| H | -2.561336000 | 1.046541000  | -4.210645000 |
| H | 2.561336000  | -1.046541000 | -4.210645000 |
| H | 4.269021000  | -1.611509000 | -2.252301000 |
| H | 3.814373000  | -1.174365000 | 3.373223000  |
| H | 1.694186000  | -0.488881000 | 4.837674000  |
| H | -1.694186000 | 0.488881000  | 4.837674000  |
| H | -3.814373000 | 1.174365000  | 3.373223000  |

## 2. Au[TPC] anion

|    |              |              |              |
|----|--------------|--------------|--------------|
| Au | 0.000000000  | 0.000000000  | 0.132052000  |
| N  | 1.403401000  | -0.416291000 | -1.201251000 |
| N  | -1.403401000 | 0.416291000  | -1.201251000 |
| N  | -1.191845000 | 0.428995000  | 1.624300000  |
| N  | 1.191845000  | -0.428995000 | 1.624300000  |
| C  | 2.666439000  | -0.892577000 | -0.886549000 |
| C  | 3.274163000  | -1.215279000 | -2.149633000 |
| C  | 2.386582000  | -0.925623000 | -3.156746000 |
| C  | 1.190288000  | -0.413711000 | -2.569026000 |
| C  | 0.000000000  | 0.000000000  | -3.205521000 |
| C  | -1.190288000 | 0.413711000  | -2.569026000 |
| C  | -2.386582000 | 0.925623000  | -3.156746000 |
| C  | -3.274163000 | 1.215279000  | -2.149633000 |
| C  | -2.666439000 | 0.892577000  | -0.886549000 |
| C  | -3.214805000 | 1.063704000  | 0.409525000  |
| C  | -2.494670000 | 0.828324000  | 1.633081000  |
| C  | -2.853906000 | 0.887811000  | 3.004667000  |
| C  | -1.733017000 | 0.518688000  | 3.775054000  |
| C  | -0.687021000 | 0.223972000  | 2.890742000  |
| C  | 0.687021000  | -0.223972000 | 2.890742000  |
| C  | 1.733017000  | -0.518688000 | 3.775054000  |
| C  | 2.853906000  | -0.887811000 | 3.004667000  |
| C  | 2.494670000  | -0.828324000 | 1.633081000  |
| C  | 3.214805000  | -1.063704000 | 0.409525000  |

|   |              |              |              |
|---|--------------|--------------|--------------|
| C | 4.615298000  | -1.522820000 | 0.525940000  |
| C | 4.951824000  | -2.630533000 | 1.321232000  |
| C | 6.266096000  | -3.062148000 | 1.442216000  |
| C | 7.291742000  | -2.400389000 | 0.771347000  |
| C | 6.979510000  | -1.297261000 | -0.018537000 |
| C | 5.664853000  | -0.864047000 | -0.134662000 |
| C | 0.000000000  | 0.000000000  | -4.694530000 |
| C | 0.882835000  | 0.812108000  | -5.415521000 |
| C | 0.886102000  | 0.811122000  | -6.805939000 |
| C | 0.000000000  | 0.000000000  | -7.508300000 |
| C | -0.886102000 | -0.811122000 | -6.805939000 |
| C | -0.882835000 | -0.812108000 | -5.415521000 |
| C | -4.615298000 | 1.522820000  | 0.525940000  |
| C | -5.664853000 | 0.864047000  | -0.134662000 |
| C | -6.979510000 | 1.297261000  | -0.018537000 |
| C | -7.291742000 | 2.400389000  | 0.771347000  |
| C | -6.266096000 | 3.062148000  | 1.442216000  |
| C | -4.951824000 | 2.630533000  | 1.321232000  |
| H | 4.160105000  | -3.160715000 | 1.836532000  |
| H | 6.490035000  | -3.927793000 | 2.057258000  |
| H | 8.318242000  | -2.737604000 | 0.865052000  |
| H | 7.767076000  | -0.761641000 | -0.538739000 |
| H | 5.436001000  | 0.008334000  | -0.734968000 |
| H | -1.567080000 | -1.451115000 | -4.869982000 |
| H | 1.567080000  | 1.451115000  | -4.869982000 |
| H | 1.577630000  | 1.452259000  | -7.342155000 |
| H | 0.000000000  | 0.000000000  | -8.592901000 |
| H | -1.577630000 | -1.452259000 | -7.342155000 |
| H | -4.160105000 | 3.160715000  | 1.836532000  |
| H | -6.490035000 | 3.927793000  | 2.057258000  |
| H | -8.318242000 | 2.737604000  | 0.865052000  |
| H | -7.767076000 | 0.761641000  | -0.538739000 |
| H | -5.436001000 | -0.008334000 | -0.734968000 |
| H | -4.258209000 | 1.639267000  | -2.266560000 |
| H | -2.541888000 | 1.073064000  | -4.213709000 |
| H | 2.541888000  | -1.073064000 | -4.213709000 |
| H | 4.258209000  | -1.639267000 | -2.266560000 |
| H | 3.826086000  | -1.156956000 | 3.385587000  |
| H | 1.686862000  | -0.466727000 | 4.852528000  |
| H | -1.686862000 | 0.466727000  | 4.852528000  |
| H | -3.826086000 | 1.156956000  | 3.385587000  |

### 3. Au[TPC] cation

|    |              |              |              |
|----|--------------|--------------|--------------|
| Au | 0.000000000  | 0.000000000  | 0.116982000  |
| N  | 1.395230000  | -0.421615000 | -1.210958000 |
| N  | -1.395230000 | 0.421615000  | -1.210958000 |



|   |              |              |              |
|---|--------------|--------------|--------------|
| N | -1.183004000 | 0.423309000  | 1.607590000  |
| N | 1.183004000  | -0.423309000 | 1.607590000  |
| C | 2.645613000  | -0.903266000 | -0.897974000 |
| C | 3.260671000  | -1.248633000 | -2.141845000 |
| C | 2.381141000  | -0.960138000 | -3.155290000 |
| C | 1.191932000  | -0.427382000 | -2.568325000 |
| C | 0.000000000  | 0.000000000  | -3.215172000 |
| C | -1.191932000 | 0.427382000  | -2.568325000 |
| C | -2.381141000 | 0.960138000  | -3.155290000 |
| C | -3.260671000 | 1.248633000  | -2.141845000 |
| C | -2.645613000 | 0.903266000  | -0.897974000 |
| C | -3.196953000 | 1.063651000  | 0.420664000  |
| C | -2.488039000 | 0.822248000  | 1.615618000  |
| C | -2.848557000 | 0.877161000  | 3.004420000  |
| C | -1.743362000 | 0.521748000  | 3.760246000  |
| C | -0.686936000 | 0.226370000  | 2.858658000  |
| C | 0.686936000  | -0.226370000 | 2.858658000  |
| C | 1.743362000  | -0.521748000 | 3.760246000  |
| C | 2.848557000  | -0.877161000 | 3.004420000  |
| C | 2.488039000  | -0.822248000 | 1.615618000  |
| C | 3.196953000  | -1.063651000 | 0.420664000  |
| C | 4.598338000  | -1.517993000 | 0.531428000  |
| C | 4.920269000  | -2.646715000 | 1.297825000  |
| C | 6.238317000  | -3.067151000 | 1.411634000  |
| C | 7.255326000  | -2.359844000 | 0.778917000  |
| C | 6.948353000  | -1.231827000 | 0.023830000  |
| C | 5.630791000  | -0.817765000 | -0.107885000 |
| C | 0.000000000  | 0.000000000  | -4.695532000 |
| C | 0.949186000  | 0.745028000  | -5.407489000 |
| C | 0.940794000  | 0.751587000  | -6.795291000 |
| C | 0.000000000  | 0.000000000  | -7.492376000 |
| C | -0.940794000 | -0.751587000 | -6.795291000 |
| C | -0.949186000 | -0.745028000 | -5.407489000 |
| C | -4.598338000 | 1.517993000  | 0.531428000  |
| C | -5.630791000 | 0.817765000  | -0.107885000 |
| C | -6.948353000 | 1.231827000  | 0.023830000  |
| C | -7.255326000 | 2.359844000  | 0.778917000  |
| C | -6.238317000 | 3.067151000  | 1.411634000  |
| C | -4.920269000 | 2.646715000  | 1.297825000  |
| H | 4.129242000  | -3.210098000 | 1.777499000  |
| H | 6.470887000  | -3.952589000 | 1.990911000  |
| H | 8.284068000  | -2.686277000 | 0.873456000  |
| H | 7.738184000  | -0.669732000 | -0.460031000 |
| H | 5.398916000  | 0.070611000  | -0.682814000 |
| H | -1.676363000 | -1.339754000 | -4.867935000 |
| H | 1.676363000  | 1.339754000  | -4.867935000 |
| H | 1.668083000  | 1.347486000  | -7.333648000 |

|   |              |              |              |
|---|--------------|--------------|--------------|
| H | 0.000000000  | 0.000000000  | -8.575825000 |
| H | -1.668083000 | -1.347486000 | -7.333648000 |
| H | -4.129242000 | 3.210098000  | 1.777499000  |
| H | -6.470887000 | 3.952589000  | 1.990911000  |
| H | -8.284068000 | 2.686277000  | 0.873456000  |
| H | -7.738184000 | 0.669732000  | -0.460031000 |
| H | -5.398916000 | -0.070611000 | -0.682814000 |
| H | -4.240419000 | 1.684214000  | -2.245750000 |
| H | -2.534236000 | 1.123528000  | -4.209014000 |
| H | 2.534236000  | -1.123528000 | -4.209014000 |
| H | 4.240419000  | -1.684214000 | -2.245750000 |
| H | 3.822814000  | -1.140357000 | 3.382870000  |
| H | 1.692734000  | -0.466721000 | 4.836129000  |
| H | -1.692734000 | 0.466721000  | 4.836129000  |
| H | -3.822814000 | 1.140357000  | 3.382870000  |

#### 4. Au[TPC(SCN)<sub>4</sub>] neutral

|    |              |              |              |
|----|--------------|--------------|--------------|
| Au | 0.000000000  | 0.000000000  | 0.638463000  |
| C  | 0.000000000  | 0.000000000  | 3.979289000  |
| C  | 0.000000000  | 0.000000000  | 5.472628000  |
| C  | 0.000000000  | 0.000000000  | 8.268736000  |
| C  | 0.064467000  | -1.201358000 | 7.571324000  |
| C  | 0.066261000  | -1.201437000 | 6.180809000  |
| C  | 0.712840000  | -0.103893000 | -2.114371000 |
| C  | 1.235360000  | -0.179119000 | 3.331219000  |
| C  | 1.334725000  | -1.698640000 | -5.182199000 |
| C  | 1.803389000  | -0.272279000 | -2.999061000 |
| C  | 2.538455000  | -0.328243000 | 3.926260000  |
| C  | 2.600812000  | -0.391226000 | -0.842053000 |
| C  | 2.758753000  | -0.398969000 | 1.658393000  |
| C  | 2.965593000  | -0.460456000 | -2.224825000 |
| C  | 3.329022000  | -0.482692000 | 0.381607000  |
| C  | 3.450722000  | -0.459976000 | 2.923791000  |
| C  | 4.812323000  | -0.654160000 | 0.344739000  |
| C  | 5.235804000  | 0.637217000  | -3.094142000 |
| C  | 5.384147000  | -1.914353000 | 0.524984000  |
| C  | 5.641568000  | 0.454085000  | 0.173402000  |
| C  | 6.765760000  | -2.064321000 | 0.520530000  |
| C  | 7.022943000  | 0.303007000  | 0.169301000  |
| C  | 7.587345000  | -0.955745000 | 0.342052000  |
| C  | -0.064467000 | 1.201358000  | 7.571324000  |
| C  | -0.066261000 | 1.201437000  | 6.180809000  |
| C  | -0.712840000 | 0.103893000  | -2.114371000 |
| C  | -1.235360000 | 0.179119000  | 3.331219000  |
| C  | -1.334725000 | 1.698640000  | -5.182199000 |

|   |              |              |              |
|---|--------------|--------------|--------------|
| C | -1.803389000 | 0.272279000  | -2.999061000 |
| C | -2.538455000 | 0.328243000  | 3.926260000  |
| C | -2.600812000 | 0.391226000  | -0.842053000 |
| C | -2.758753000 | 0.398969000  | 1.658393000  |
| C | -2.965593000 | 0.460456000  | -2.224825000 |
| C | -3.329022000 | 0.482692000  | 0.381607000  |
| C | -3.450722000 | 0.459976000  | 2.923791000  |
| C | -4.812323000 | 0.654160000  | 0.344739000  |
| C | -5.235804000 | -0.637217000 | -3.094142000 |
| C | -5.384147000 | 1.914353000  | 0.524984000  |
| C | -5.641568000 | -0.454085000 | 0.173402000  |
| C | -6.765760000 | 2.064321000  | 0.520530000  |
| C | -7.022943000 | -0.303007000 | 0.169301000  |
| C | -7.587345000 | 0.955745000  | 0.342052000  |
| H | 0.000000000  | 0.000000000  | 9.352488000  |
| H | 0.111684000  | -2.140822000 | 8.109708000  |
| H | 0.115112000  | -2.137702000 | 5.636664000  |
| H | 2.728448000  | -0.325459000 | 4.987472000  |
| H | 4.516726000  | -0.582658000 | 3.025775000  |
| H | 4.742640000  | -2.777316000 | 0.661102000  |
| H | 5.204248000  | 1.435143000  | 0.031342000  |
| H | 7.200874000  | -3.047519000 | 0.656553000  |
| H | 7.655124000  | 1.170444000  | 0.022110000  |
| H | 8.664801000  | -1.073101000 | 0.337058000  |
| H | -0.111684000 | 2.140822000  | 8.109708000  |
| H | -0.115112000 | 2.137702000  | 5.636664000  |
| H | -2.728448000 | 0.325459000  | 4.987472000  |
| H | -4.516726000 | 0.582658000  | 3.025775000  |
| H | -4.742640000 | 2.777316000  | 0.661102000  |
| H | -5.204248000 | -1.435143000 | 0.031342000  |
| H | -7.200874000 | 3.047519000  | 0.656553000  |
| H | -7.655124000 | -1.170444000 | 0.022110000  |
| H | -8.664801000 | 1.073101000  | 0.337058000  |
| N | 1.015018000  | -2.761619000 | -5.510142000 |
| N | 1.252523000  | -0.184677000 | -0.854916000 |
| N | 1.419702000  | -0.230173000 | 1.975736000  |
| N | 5.752270000  | 1.664581000  | -3.225799000 |
| N | -1.015018000 | 2.761619000  | -5.510142000 |
| N | -1.252523000 | 0.184677000  | -0.854916000 |
| N | -1.419702000 | 0.230173000  | 1.975736000  |
| N | -5.752270000 | -1.664581000 | -3.225799000 |
| S | 1.798217000  | -0.124468000 | -4.761382000 |
| S | 4.535659000  | -0.894456000 | -2.914018000 |
| S | -1.798217000 | 0.124468000  | -4.761382000 |
| S | -4.535659000 | 0.894456000  | -2.914018000 |

**5. Au[TPC(SCN)<sub>4</sub>] anion**

|    |              |              |              |
|----|--------------|--------------|--------------|
| Au | 0.000000000  | 0.000000000  | 0.661742000  |
| C  | 0.000000000  | 0.000000000  | 4.018035000  |
| C  | 0.000000000  | 0.000000000  | 5.507176000  |
| C  | 0.000000000  | 0.000000000  | 8.314683000  |
| C  | 0.327939000  | -1.155109000 | 6.223609000  |
| C  | 0.328305000  | -1.156277000 | 7.614075000  |
| C  | 0.715101000  | -0.118950000 | -2.104395000 |
| C  | 1.233878000  | -0.208881000 | 3.374585000  |
| C  | 1.528377000  | -1.623185000 | -5.296355000 |
| C  | 1.788257000  | -0.283892000 | -2.985866000 |
| C  | 2.531582000  | -0.352127000 | 3.956657000  |
| C  | 2.599844000  | -0.444744000 | -0.827667000 |
| C  | 2.749311000  | -0.460745000 | 1.686963000  |
| C  | 2.964363000  | -0.507489000 | -2.203659000 |
| C  | 3.325405000  | -0.548900000 | 0.403854000  |
| C  | 3.443934000  | -0.503325000 | 2.946495000  |
| C  | 4.807766000  | -0.710309000 | 0.365288000  |
| C  | 5.260479000  | 0.501662000  | -3.195008000 |
| C  | 5.402509000  | -1.941535000 | 0.650910000  |
| C  | 5.633717000  | 0.378532000  | 0.077212000  |
| C  | 6.784996000  | -2.084866000 | 0.632927000  |
| C  | 7.015832000  | 0.237429000  | 0.053004000  |
| C  | 7.596184000  | -0.995535000 | 0.329980000  |
| C  | -0.327939000 | 1.155109000  | 6.223609000  |
| C  | -0.328305000 | 1.156277000  | 7.614075000  |
| C  | -0.715101000 | 0.118950000  | -2.104395000 |
| C  | -1.233878000 | 0.208881000  | 3.374585000  |
| C  | -1.528377000 | 1.623185000  | -5.296355000 |
| C  | -1.788257000 | 0.283892000  | -2.985866000 |
| C  | -2.531582000 | 0.352127000  | 3.956657000  |
| C  | -2.599844000 | 0.444744000  | -0.827667000 |
| C  | -2.749311000 | 0.460745000  | 1.686963000  |
| C  | -2.964363000 | 0.507489000  | -2.203659000 |
| C  | -3.325405000 | 0.548900000  | 0.403854000  |
| C  | -3.443934000 | 0.503325000  | 2.946495000  |
| C  | -4.807766000 | 0.710309000  | 0.365288000  |
| C  | -5.260479000 | -0.501662000 | -3.195008000 |
| C  | -5.402509000 | 1.941535000  | 0.650910000  |
| C  | -5.633717000 | -0.378532000 | 0.077212000  |
| C  | -6.784996000 | 2.084866000  | 0.632927000  |
| C  | -7.015832000 | -0.237429000 | 0.053004000  |
| C  | -7.596184000 | 0.995535000  | 0.329980000  |
| H  | 0.000000000  | 0.000000000  | 9.398924000  |
| H  | 0.577435000  | -2.058049000 | 5.678798000  |
| H  | 0.580303000  | -2.064192000 | 8.150911000  |

|   |              |              |              |
|---|--------------|--------------|--------------|
| H | 2.736289000  | -0.327215000 | 5.014936000  |
| H | 4.510200000  | -0.622608000 | 3.049249000  |
| H | 4.769155000  | -2.791604000 | 0.877592000  |
| H | 5.184757000  | 1.338841000  | -0.147176000 |
| H | 7.229439000  | -3.050155000 | 0.849424000  |
| H | 7.636381000  | 1.090938000  | -0.194096000 |
| H | 8.674474000  | -1.107630000 | 0.307684000  |
| H | -0.577435000 | 2.058049000  | 5.678798000  |
| H | -0.580303000 | 2.064192000  | 8.150911000  |
| H | -2.736289000 | 0.327215000  | 5.014936000  |
| H | -4.510200000 | 0.622608000  | 3.049249000  |
| H | -4.769155000 | 2.791604000  | 0.877592000  |
| H | -5.184757000 | -1.338841000 | -0.147176000 |
| H | -7.229439000 | 3.050155000  | 0.849424000  |
| H | -7.636381000 | -1.090938000 | -0.194096000 |
| H | -8.674474000 | 1.107630000  | 0.307684000  |
| N | 1.252726000  | -0.222413000 | -0.838562000 |
| N | 1.353371000  | -2.678187000 | -5.741574000 |
| N | 1.415223000  | -0.285132000 | 2.005001000  |
| N | 5.820141000  | 1.491909000  | -3.415591000 |
| N | -1.252726000 | 0.222413000  | -0.838562000 |
| N | -1.353371000 | 2.678187000  | -5.741574000 |
| N | -1.415223000 | 0.285132000  | 2.005001000  |
| N | -5.820141000 | -1.491909000 | -3.415591000 |
| S | 1.788049000  | -0.045192000 | -4.728958000 |
| S | 4.504388000  | -0.990750000 | -2.895707000 |
| S | -1.788049000 | 0.045192000  | -4.728958000 |
| S | -4.504388000 | 0.990750000  | -2.895707000 |

## 6. Au[TPC(SCN)<sub>4</sub>] cation

|    |             |              |              |
|----|-------------|--------------|--------------|
| Au | 0.000000000 | 0.000000000  | 0.687296000  |
| C  | 0.000000000 | 0.000000000  | 4.032605000  |
| C  | 0.000000000 | 0.000000000  | 5.508048000  |
| C  | 0.000000000 | 0.000000000  | 8.305129000  |
| C  | 0.275015000 | -1.994771000 | -4.630479000 |
| C  | 0.600356000 | -1.044856000 | 7.608449000  |
| C  | 0.611542000 | -1.041898000 | 6.221775000  |
| C  | 0.704746000 | -0.173472000 | -2.054197000 |
| C  | 1.254898000 | -0.130239000 | 3.377132000  |
| C  | 1.717254000 | -0.639195000 | -2.931175000 |
| C  | 2.561447000 | -0.111117000 | 3.957944000  |
| C  | 2.574238000 | -0.526401000 | -0.799184000 |
| C  | 2.764354000 | -0.364322000 | 1.709196000  |
| C  | 2.873208000 | -0.862536000 | -2.164440000 |
| C  | 3.329506000 | -0.521814000 | 0.406244000  |
| C  | 3.475085000 | -0.246407000 | 2.947049000  |

|   |              |              |              |
|---|--------------|--------------|--------------|
| C | 4.799821000  | -0.600042000 | 0.323251000  |
| C | 5.106420000  | -0.479042000 | -3.567320000 |
| C | 5.494628000  | 0.362077000  | -0.423165000 |
| C | 5.521508000  | -1.591588000 | 1.002392000  |
| C | 6.878907000  | 0.338882000  | -0.480044000 |
| C | 6.904928000  | -1.625937000 | 0.919461000  |
| C | 7.586563000  | -0.657746000 | 0.185614000  |
| C | -0.275015000 | 1.994771000  | -4.630479000 |
| C | -0.600356000 | 1.044856000  | 7.608449000  |
| C | -0.611542000 | 1.041898000  | 6.221775000  |
| C | -0.704746000 | 0.173472000  | -2.054197000 |
| C | -1.254898000 | 0.130239000  | 3.377132000  |
| C | -1.717254000 | 0.639195000  | -2.931175000 |
| C | -2.561447000 | 0.111117000  | 3.957944000  |
| C | -2.574238000 | 0.526401000  | -0.799184000 |
| C | -2.764354000 | 0.364322000  | 1.709196000  |
| C | -2.873208000 | 0.862536000  | -2.164440000 |
| C | -3.329506000 | 0.521814000  | 0.406244000  |
| C | -3.475085000 | 0.246407000  | 2.947049000  |
| C | -4.799821000 | 0.600042000  | 0.323251000  |
| C | -5.106420000 | 0.479042000  | -3.567320000 |
| C | -5.494628000 | -0.362077000 | -0.423165000 |
| C | -5.521508000 | 1.591588000  | 1.002392000  |
| C | -6.878907000 | -0.338882000 | -0.480044000 |
| C | -6.904928000 | 1.625937000  | 0.919461000  |
| C | -7.586563000 | 0.657746000  | 0.185614000  |
| H | 0.000000000  | 0.000000000  | 9.388505000  |
| H | 1.056545000  | -1.866320000 | 8.147552000  |
| H | 1.065183000  | -1.865317000 | 5.683952000  |
| H | 2.772991000  | 0.019934000  | 5.005900000  |
| H | 4.547491000  | -0.243447000 | 3.045099000  |
| H | 4.947000000  | 1.138271000  | -0.943804000 |
| H | 4.992328000  | -2.352953000 | 1.562691000  |
| H | 7.402893000  | 1.093000000  | -1.053940000 |
| H | 7.454363000  | -2.410776000 | 1.425131000  |
| H | 8.668201000  | -0.682847000 | 0.129694000  |
| H | -1.056545000 | 1.866320000  | 8.147552000  |
| H | -1.065183000 | 1.865317000  | 5.683952000  |
| H | -2.772991000 | -0.019934000 | 5.005900000  |
| H | -4.547491000 | 0.243447000  | 3.045099000  |
| H | -4.947000000 | -1.138271000 | -0.943804000 |
| H | -4.992328000 | 2.352953000  | 1.562691000  |
| H | -7.402893000 | -1.093000000 | -1.053940000 |
| H | -7.454363000 | 2.410776000  | 1.425131000  |
| H | -8.668201000 | 0.682847000  | 0.129694000  |
| N | 0.647034000  | 2.692951000  | -4.614787000 |
| N | 1.258721000  | -0.160466000 | -0.810680000 |

|   |              |              |              |
|---|--------------|--------------|--------------|
| N | 1.425144000  | -0.276922000 | 2.024771000  |
| N | 5.687619000  | 0.352738000  | -4.122641000 |
| N | -0.647034000 | -2.692951000 | -4.614787000 |
| N | -1.258721000 | 0.160466000  | -0.810680000 |
| N | -1.425144000 | 0.276922000  | 2.024771000  |
| N | -5.687619000 | -0.352738000 | -4.122641000 |
| S | 1.607922000  | -0.950226000 | -4.666933000 |
| S | 4.300744000  | -1.727393000 | -2.756476000 |
| S | -1.607922000 | 0.950226000  | -4.666933000 |
| S | -4.300744000 | 1.727393000  | -2.756476000 |
